## **High Impedance Microstrip Resonators and Transceiver Arrays for Ultrahigh Field 10.5T MR Imaging**

Xiaoliang Zhang<sup>1,2\*</sup>, Komlan Payne<sup>1</sup>, Yunkun Zhao<sup>1</sup>

<sup>1</sup>Department of Biomedical Engineering, State University of New York at Buffalo, Buffalo, NY 14260, USA

<sup>2</sup>Department of Electrical Engineering, State University of New York at Buffalo, Buffalo, NY 14260, USA

\*Corresponding to

Xiaoliang Zhang, Ph.D.

Department of Biomedical Engineering

State University of New York at Buffalo

Bonner Hall 215E

Buffalo, NY 14260

USA

Email: [xzhang89@buffalo.edu](mailto:xzhang89@buffalo.edu)

## **Abstract**

Multichannel transceiver coil arrays are needed to enable parallel imaging and B1 manipulation in ultrahigh field MR imaging and spectroscopy. However, the design of such transceiver coils and coil arrays often faces technical challenges in achieving the required high operating frequency at the ultrahigh fields and sufficient electromagnetic (EM) decoupling between resonant elements. In this work, we propose a high impedance microstrip transmission line resonator (HIMTL) technique that has unique high frequency capability and adequate EM decoupling without the use of dedicated decoupling circuits. To validate the proposed technique for the ultrahigh field 10.5T applications, a two-channel high impedance microstrip array with the element dimension of 8cm by 8cm was built and tuned to 447 MHz, Larmor frequency of proton at 10.5T, for signal excitation and reception. Bench tests and numerical simulations were performed to evaluate its feasibility and performance. The results show that the proposed high impedance microstrip technique can be a simple and robust way to design high frequency transceiver coils and coil arrays for ultrahigh field MR applications.

**Keywords: RF coil, coil array, decoupling, microstrip transmission line resonator, ultrahigh field MRI, 10.5T, MR imaging.**

## Introduction

Whole-body MR imaging at ultrahigh magnetic fields, such as 7T and 10.5T, offers significant advantages, including improved signal-to-noise ratio (SNR), which is crucial for achieving high spatial and temporal resolutions as well as enhanced spectral dispersion [1-9]. However, as the magnetic field strength increases, the corresponding Larmor frequency rises proportionally, posing considerable challenges in designing highly efficient RF coils—key components for MR signal excitation and reception. These challenges become even more pronounced in human imaging due to the requirement for large RF coils [10-25].

At such high frequencies, for example, 447 MHz at 10.5T, tuning RF coils is particularly difficult due to their large inductance and non-negligible parasitic capacitance [26]. Furthermore, the increased radiative behavior of resonant circuits at high frequencies significantly degrades the quality factor (Q-factor) of RF coils and exacerbates electromagnetic (EM) coupling between resonant elements in coil arrays, making multichannel coil array design particularly challenging [27-34].

Microstrip resonators, known for their high-frequency capability, high Q-factors, and reduced radiation losses, have been widely utilized in high-field and ultrahigh-field MR applications [35-42]. Additionally, it has been shown that high-impedance coil designs can reduce EM coupling between array elements, as demonstrated in 1.5T NMR phased arrays [43, 44]. Recent studies have further validated this approach for ultrahigh-field applications, including 7T [45-50].

In this work, we propose a novel microstrip transmission line resonator design that incorporates a unique circuit configuration to achieve both high resonant frequency and high impedance. This design combines the high-frequency capability of microstrip coils with the excellent EM decoupling performance of high-impedance coils, addressing the challenges associated with multichannel coil arrays at the ultrahigh field 10.5T. The proposed technique was validated through numerical simulations and standard RF measurements on a prototype 2-channel high-impedance microstrip array.

The results demonstrate that the proposed high-impedance microstrip coil technique is a practical and efficient solution for designing multichannel coil arrays at ultrahigh magnetic fields, specifically for 10.5T MR imaging.

## Methods:

Two high impedance microstrip resonators with a dimension of 8cm by 8 cm were designed and constructed. The 3mm copper tape was used for making the strip conductor. The substrate material is Teflon, and its thickness is ~2mm. The coil schematics is shown in **Fig 1**.  $C_t$  and  $C_m$  are tuning and matching capacitors, respectively. This coil has two resonant modes. The high frequency modes possess high impedance feature and thus decoupling advantages, and therefore, is used for this 10.5T proton imaging application. The low frequency mode may not have a high impedance, and stronger coupling between resonant elements should be expected. **Fig 2** shows the photograph of the prototype high impedance microstrip coils set up in a plane and around a human head phantom. The coil's resonant frequency, Q-factors, decoupling performance were tested on a network analyzer through the measurement of scattering parameters. The coil array was further investigated using numerical simulation tool for its B1 distribution and efficiency of each channel and its decoupling performance.

## Results:

The high impedance microstrip was conveniently tuned to 447MHz level and its input impedance was matched to the system's 50 ohm with a tunable capacitor. The decoupling performance was tested in two different gaps between the two resonant elements, 10 mm and 2mm. **Fig 3** shows the results of S11 and S21 measurement of the 10.5T high impedance microstrip array when it's loaded with the human head phantom. The high frequency mode (447MHz) demonstrates robust decoupling of -21 dB between two channels when the two elements are 10mm apart, while the low frequency mode (at 116MHz) shows stronger coupling with a S21 of ~ -7.6 dB. Testing with a smaller gap of 2mm shows the low frequency had an unacceptable decoupling, making its resonant peak split, as shown in **Fig 4**. Therefore, unlike the high frequency mode, the low frequency mode does not have the self-decoupling capability. A numerical model of the proposed high impedance microstrip coil was built using Ansys simulation software. In the numerical modeling and simulation as shown in **Fig 5**, well defined B1 distribution of each channel was observed, indicating the excellent decoupling performance of the high frequency mode. The calculated B1+ value, with  $2\mu\text{T}/\sqrt{W}$  maximum, of the coil elements is also in a reasonable range.

## **Conclusion:**

A high impedance microstrip coil array was designed and tested for 10.5T MR applications. The coil design technique demonstrates its excellence in high frequency operation and element decoupling performance at 447MHz. This technique provides a simple and robust way to design high frequency transceiver arrays for ultrahigh field MR applications.

## **Acknowledgements:**

This work is supported in part by the NIH under a BRP grant U01 EB023829 and by the State University of New York (SUNY) under SUNY Empire Innovation Professorship Award.

## Figures:

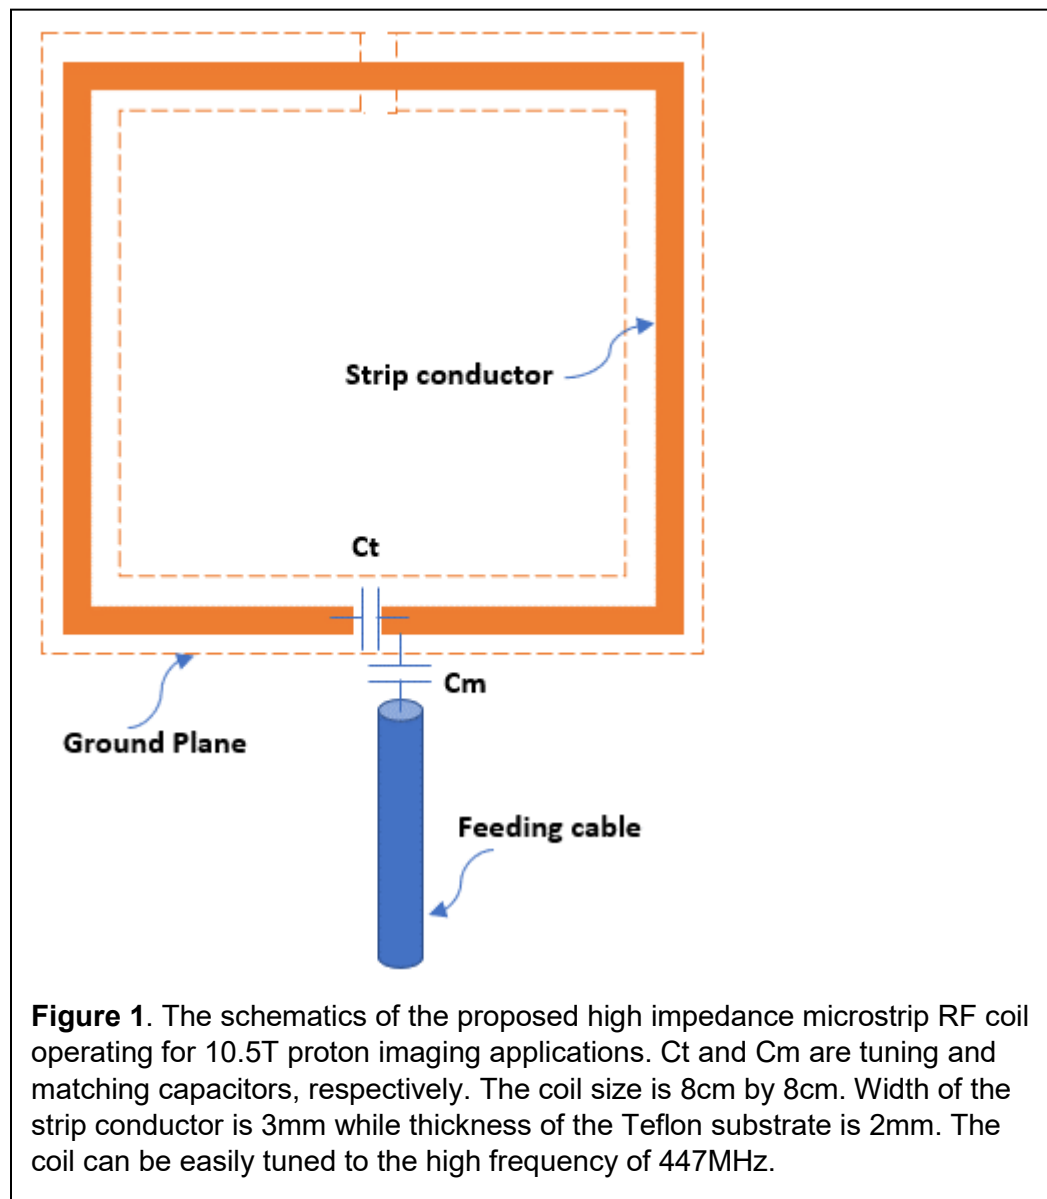

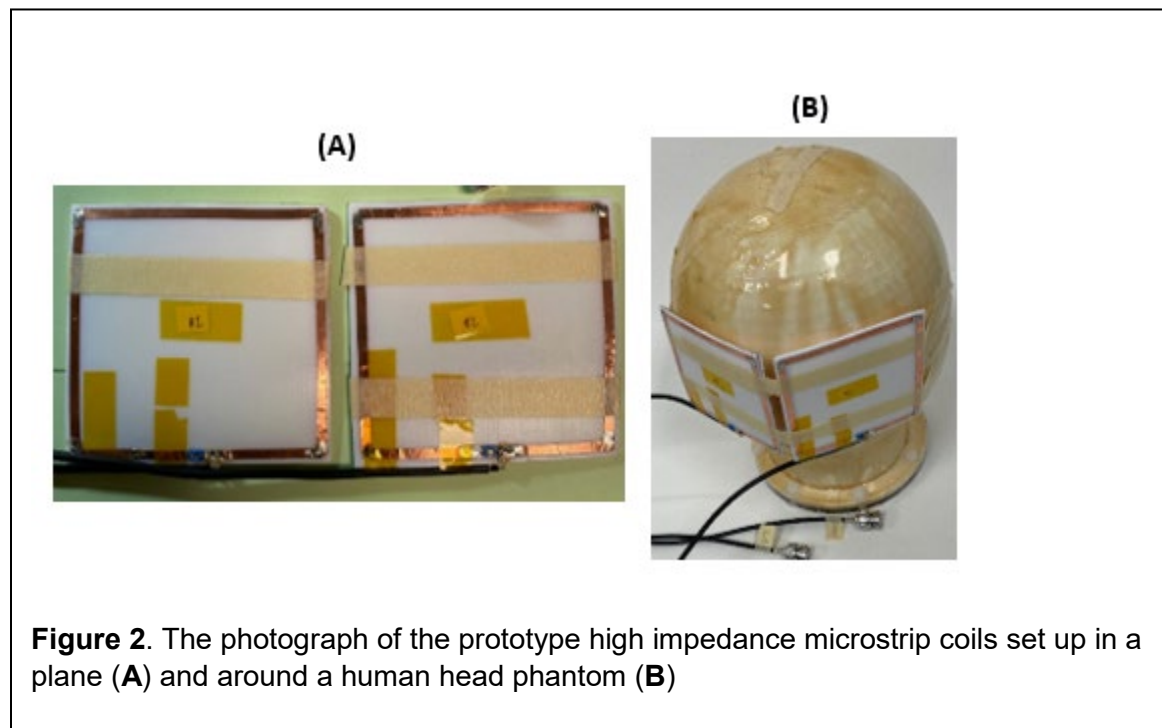

## Resonant elements 10mm apart

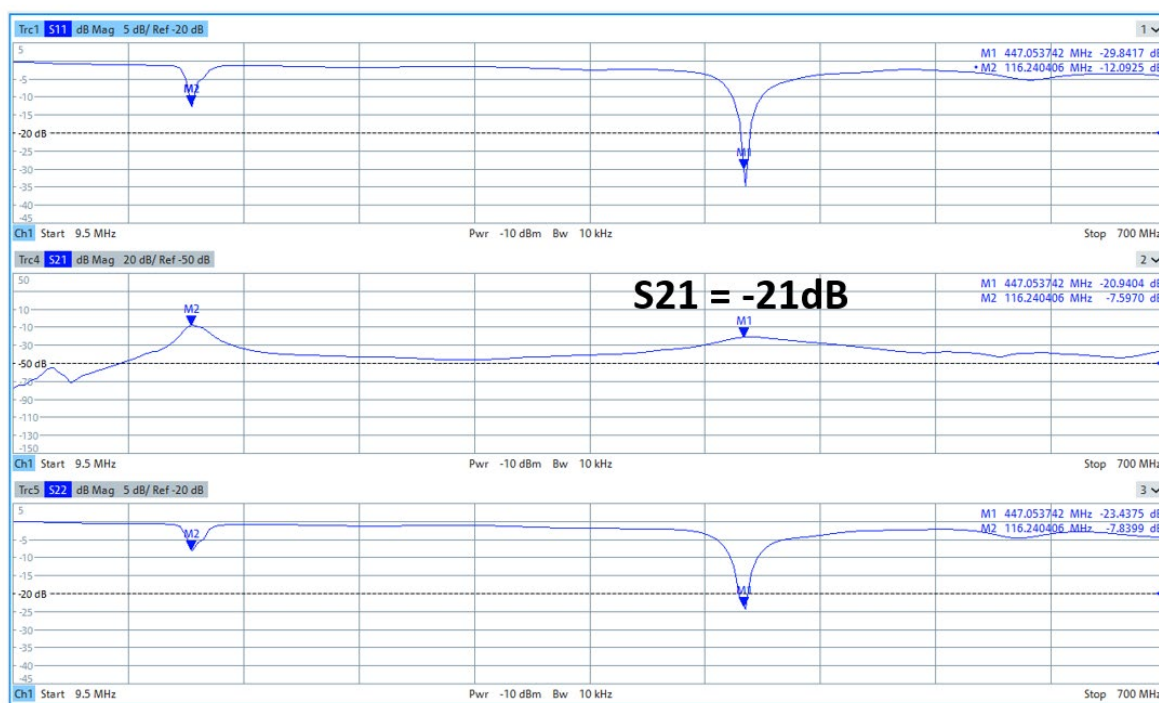

**Figure 3.** S-parameter measurement of the proposed high impedance microstrip array at 447MHz. The results demonstrate the excellent decoupling performance of the high frequency mode (at 447MHz) while the low frequency mode is weakly coupled. The gap between the coil element is 10mm.



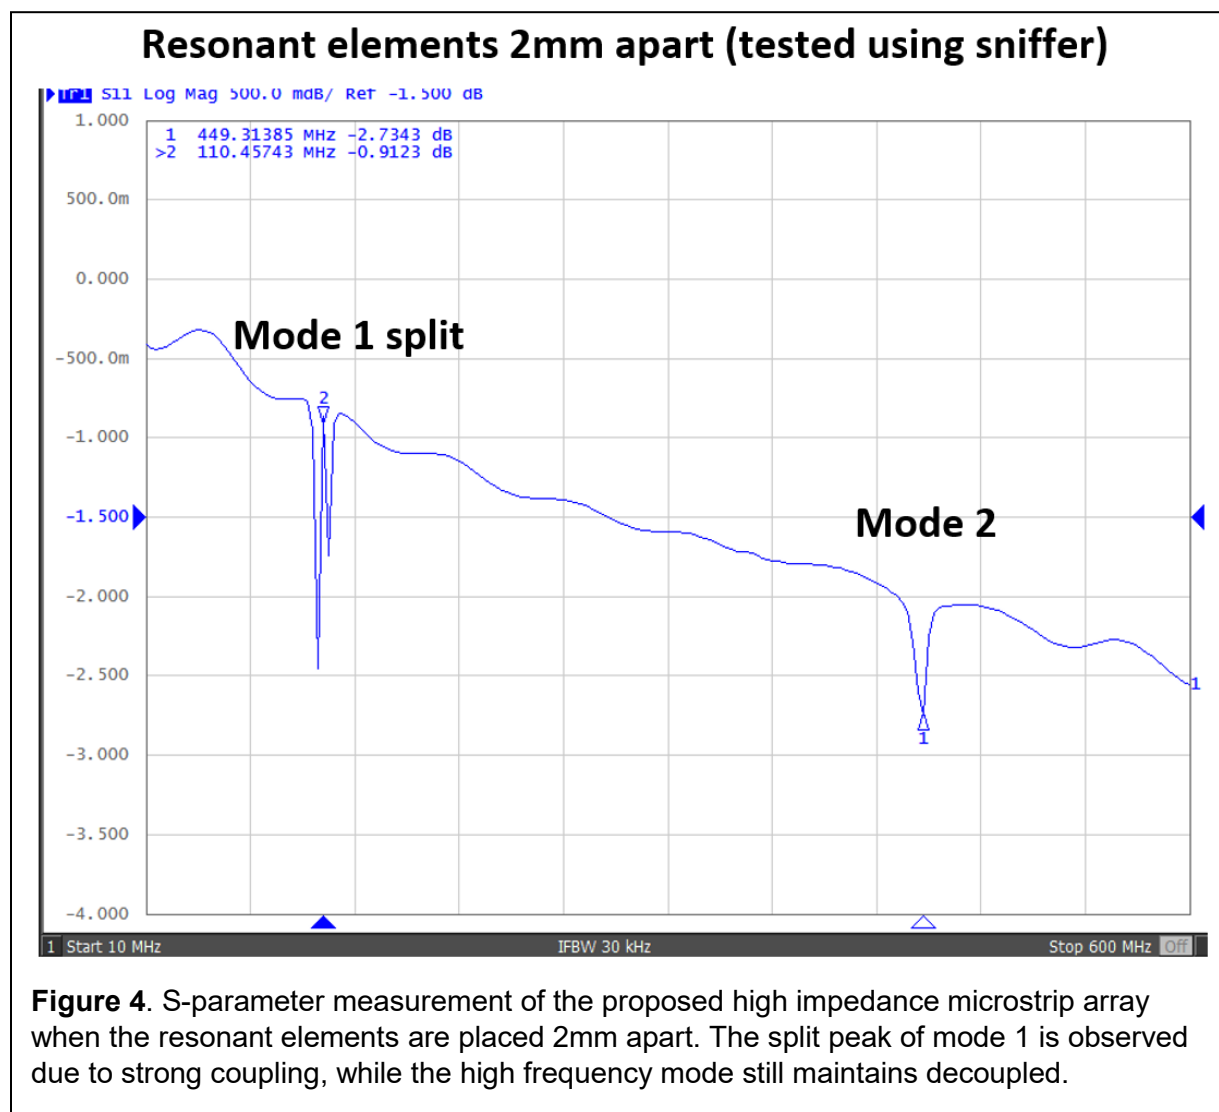

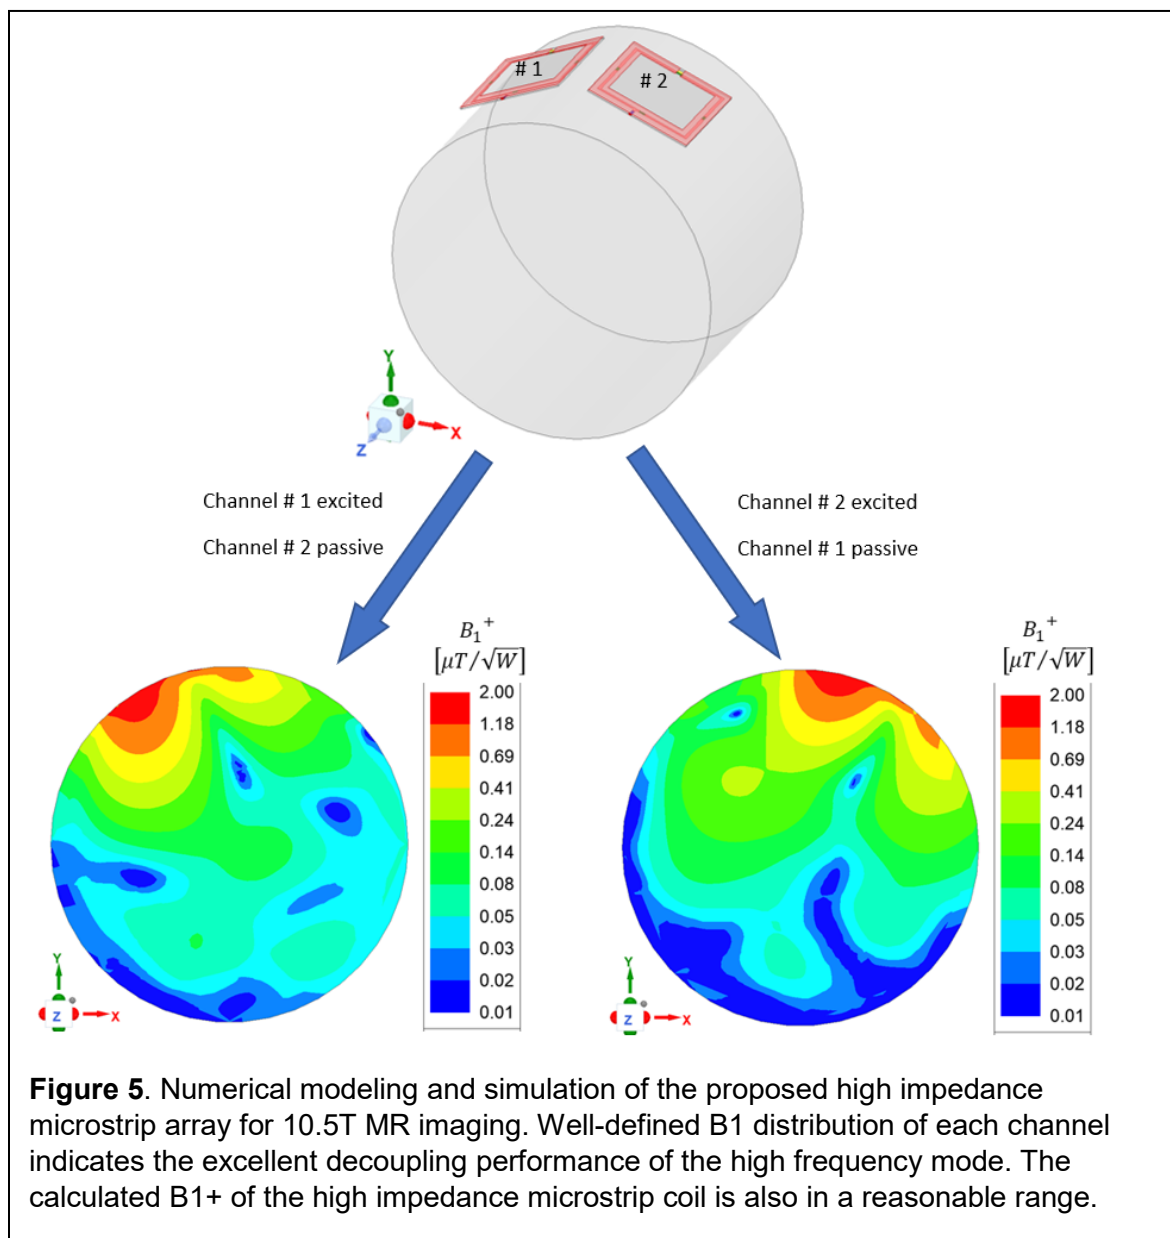

## Reference:

1. Ugurbil, K., et al., *Ultrahigh field magnetic resonance imaging and spectroscopy*. Magn Reson Imaging, 2003. **21**(10): p. 1263-81.
2. Wu, B., et al., *7T human spine imaging arrays with adjustable inductive decoupling*. IEEE Trans Biomed Eng, 2010. **57**(2): p. 397-403.
3. Wu, B., et al., *Multi-Channel Microstrip Transceiver Arrays Using Harmonics for High Field MR Imaging in Humans*. IEEE Trans Med Imaging, 2011 Aug 30, Epub ahead of print.
4. Grant, A., et al., *10.5 T MRI static field effects on human cognitive, vestibular, and physiological function*. Magn Reson Imaging, 2020. **73**: p. 163-176.
5. Zhang, X., et al., *A Wrap-on Decoupled Coaxial Transmission Line (CTL) Transceiver Array for Head MR Imaging at 10.5T*. Proc Int Soc Magn Reson Med Sci Meet Exhib Int Soc Magn Reson Med Sci Meet Exhib, 2023. **31**: p. 3904.
6. Zhang, X., et al., *Design and Test of a Flexible Two-row CTL Array and Its Detunable Resonant Elements for 10.5T MR Imaging*. Proc Int Soc Magn Reson Med Sci Meet Exhib Int Soc Magn Reson Med Sci Meet Exhib, 2023. **31**: p. 4593.
7. Zhang, X., *Sensitivity enhancement of traveling wave MRI using free local resonators: an experimental demonstration*. Quant Imaging Med Surg, 2017. **7**(2): p. 170-176.
8. Zhang, X., et al., *Measurement of arterial input function of 17O water tracer in rat carotid artery by using a region-defined (REDE) implanted vascular RF coil*. MAGMA, 2003. **16**(2): p. 77-85.
9. Bhosale, A.A., D. Gawande, and X. Zhang, *A Dielectric Material Coated Half-Wave Dipole antenna for Ultrahigh Field MRI at 7T/300MHz*. Proc Int Soc Magn Reson Med Sci Meet Exhib Int Soc Magn Reson Med Sci Meet Exhib, 2022. **30**: p. 4103.
10. Adriany, G., et al., *Transmit and receive transmission line arrays for 7 Tesla parallel imaging*. Magn Reson Med, 2005. **53**(2): p. 434-45.
11. Wu, B., et al., *Flexible transceiver array for ultrahigh field human MR imaging* Magn Reson Med, In revision, 2010.
12. Payne, K., et al., *Dual-tuned Coaxial-transmission-line RF coils for Hyperpolarized (13)C and Deuterium (2)H Metabolic MRS Imaging at Ultrahigh Fields*. IEEE Trans Biomed Eng, 2023. **PP**.
13. Payne, K., A.A. Bhosale, and X. Zhang, *Double cross magnetic wall decoupling for quadrature transceiver RF array coils using common-mode differential-mode resonators*. J Magn Reson, 2023. **353**: p. 107498.
14. Wu, B., et al., *Shielded microstrip array for 7T human MR imaging*. IEEE Trans Med Imaging, 2010. **29**(1): p. 179-84.
15. Pang, Y., et al., *Resonant mode reduction in radiofrequency volume coils for ultrahigh field magnetic resonance imaging*. Materials, 2011. **4**(8): p. 1333-1344.
16. Bhosale, A.A., L.L. Ying, and X. Zhang, *Design of a 13-Channel hybrid RF array with field rectification of dielectric material for foot/ankle imaging at 7T*. Proc Int Soc Magn Reson Med Sci Meet Exhib Int Soc Magn Reson Med Sci Meet Exhib, 2022. **30**: p. 4433.
17. Zhang, X. *NMR Experiments Using No RF Coil: RF-Coilless NMR*. in *Proc. Intl. Soc. Mag. Reson. Med.* 2008. Toronto, Canada.
18. Pang, Y., et al., *Design and numerical evaluation of a volume coil array for parallel MR imaging at ultrahigh fields*. Quant Imaging Med Surg, 2014. **4**(1): p. 50-6.
19. Yan, X., et al., *Design and Test of Magnetic Wall Decoupling for Dipole Transmit/Receive Array for MR Imaging at the Ultrahigh Field of 7T*. Appl Magn Reson, 2015. **46**(1): p. 59-66.

20. Yan, X., et al., *Magnetic wall decoupling method for monopole coil array in ultrahigh field MRI: a feasibility test*. Quant Imaging Med Surg, 2014. **4**(2): p. 79-86.
21. Pang, Y., et al., *Numerical Analysis of Human Sample Effect on RF Penetration and Liver MR Imaging at Ultrahigh Field*. Concepts Magn Reson Part B Magn Reson Eng, 2011. **39B**(4): p. 206-216.
22. Qi, S., et al., *Cortical inhibition deficits in recent onset PTSD after a single prolonged trauma exposure*. Neuroimage Clin, 2013. **3**: p. 226-33.
23. Pang, Y., D. Vigneron, and X. Zhang, *MR experiment validation of parallel traveling-wave with quadrature patch antenna transceiver array*. Proc Int Soc Magn Reson Med Sci Meet Exhib, 2011. **19**: p. 1904.
24. Yang, Q.X., et al., *Phantom design in the presence of wave behavior of the radiofrequency field*. Proc Int Soc Magn Reson Med Sci Meet Exhib, 2002. **10**: p. 913.
25. Wang, C., et al., *A Microstrip Volume Coil with Easy Access for Wrist Imaging at 7T*. Proc Int Soc Magn Reson Med Sci Meet Exhib, 2009. **17**: p. 2946.
26. Payne, K., et al., *Eight-channel dual-tuned coaxial-transmission-line coils array for human head imaging at 10.5 Tesla*. Proc. Intl. Soc. Mag. Reson. Med., 2024. **32**: p. 465.
27. Li, Y., et al., *ICE decoupling technique for RF coil array designs*. Med Phys, 2011. **38**(7): p. 4086-93.
28. Zhang, X. and J.X. Ji, *Parallel and sparse MR imaging: methods and instruments-Part 1*. Quant Imaging Med Surg, 2014. **4**(1): p. 1-3.
29. Ji, J.X. and X. Zhang, *Parallel and sparse MR imaging: methods and instruments-Part 2*. Quant Imaging Med Surg, 2014. **4**(2): p. 68-70.
30. Pang, Y., D.B. Vigneron, and X. Zhang, *Parallel traveling-wave MRI: a feasibility study*. Magn Reson Med, 2012. **67**(4): p. 965-78.
31. Rutledge, O., et al., *Design and test of a double-nuclear RF coil for (1)H MRI and (13)C MRSI at 7T*. J Magn Reson, 2016. **267**: p. 15-21.
32. Pang, Y., et al., *Common-mode differential-mode (CMDM) method for double-nuclear MR signal excitation and reception at ultrahigh fields*. IEEE Trans Med Imaging, 2011. **30**(11): p. 1965-73.
33. Yan, X., et al., *Hybrid monopole/loop coil array for human head MR imaging at 7T*. Appl Magn Reson, 2015. **46**(5): p. 541-550.
34. Wang, Y.X., et al., *Magnetic resonance imaging for lung cancer screen*. J Thorac Dis, 2014. **6**(9): p. 1340-8.
35. Zhang, X., K. Ugurbil, and W. Chen, *Microstrip RF surface coil design for extremely high-field MRI and spectroscopy*. Magn Reson Med, 2001. **46**(3): p. 443-50.
36. Zhang, X., K. Ugurbil, and W. Chen, *A microstrip transmission line volume coil for human head MR imaging at 4T*. J Magn Reson, 2003. **161**(2): p. 242-51.
37. Zhang, X., et al., *An inverted-microstrip resonator for human head proton MR imaging at 7 tesla*. IEEE Trans Biomed Eng, 2005. **52**(3): p. 495-504.
38. Zhang, X., et al. *A circular-polarized double-tuned (31P and 1H) TEM coil for human head MRI/MRS at 7T*. in Proc. Intl. Soc. Mag. Reson. Med. 2003.
39. Zhang, X., X.H. Zhu, and W. Chen, *Higher-order harmonic transmission-line RF coil design for MR applications*. Magn Reson Med, 2005. **53**(5): p. 1234-9.
40. Zhang, X., S. Ogawa, and W. Chen, *An inverted microstrip transmission line (iMTL) surface coil for 3T and 4T MR imaging*. The 48th Experimental Nuclear Magnetic Resonance Conference (ENC), 2007. **48**.
41. Pang, Y., et al., *A dual-tuned quadrature volume coil with mixed lambda/2 and lambda/4 microstrip resonators for multinuclear MRSI at 7 T*. Magn Reson Imaging, 2012. **30**(2): p. 290-8.
42. Payne, K., S.I. Khan, and X. Zhang, *Investigation of Magnetic Wall Decoupling for planar Quadrature RF Array coils using Common-Mode Differential-mode Resonators*. Proc Int

- Soc Magn Reson Med Sci Meet Exhib Int Soc Magn Reson Med Sci Meet Exhib, 2022. **30**.
43. Roemer, P.B., et al., *The NMR phased array*. Magn Reson Med, 1990. **16**(2): p. 192-225.
  44. Li, Y., et al., *Investigation of multichannel phased array performance for fetal MR imaging on 1.5T clinical MR system*. Quant Imaging Med Surg, 2011. **1**: p. 24-30.
  45. Payne, K., L.L. Ying, and X. Zhang, *Hairpin RF resonators for MR imaging transceiver arrays with high inter-channel isolation and B(1) efficiency at ultrahigh field 7 T*. J Magn Reson, 2022. **345**: p. 107321.
  46. Bhosale, A.A., Y. Zhao, and X. Zhang, *Electric field and SAR reduction in high-impedance RF arrays by using high permittivity materials for 7T MR imaging*. PLoS One, 2024. **19**(7): p. e0305464.
  47. Bhosale, A.A., D. Gawande, and X. Zhang, *B1 field flattening and length control of half-wave dipole antenna with discrete dielectric coating*. Proc Int Soc Magn Reson Med Sci Meet Exhib Int Soc Magn Reson Med Sci Meet Exhib, 2022. **30**: p. 4104.
  48. Bhosale, A.A., L.L. Ying, and X. Zhang, *An 8-Channel High-permittivity Dielectric Material-Coated Half-Wave Dipole Antenna Array for Knee Imaging at 7T*. Proc Int Soc Magn Reson Med Sci Meet Exhib Int Soc Magn Reson Med Sci Meet Exhib, 2022. **30**: p. 4105.
  49. Gao, T. and X. Zhang, *Development of high impedance microstrip resonators for ultrahigh field MR imaging*. Proc Int Soc Magn Reson Med Sci Meet Exhib, 2022. **30**: p. 4505.
  50. Payne, K. and X. Zhang, *Quadrature RF array using High Impedance concept for improved transmit RF field B(1) efficiency at 7 Tesla*. Proc Int Soc Magn Reson Med Sci Meet Exhib Int Soc Magn Reson Med Sci Meet Exhib, 2022. **30**.
